# Supplementary material for: Measurement and interpretation of unary supercritical gas adsorption isotherms in micro-mesoporous solids
Source: Springer Nature journal article supplement (doi:10.1007/s10450-021-00313-z), 2021-03-25
Supplement: MOESM1 [file 19007840]

## Supporting Information File

# Measurement and interpretation of unary supercritical gas adsorption isotherms in micro-mesoporous solids

Ronny Pini<sup>a,\*</sup>, Humera Ansari<sup>a</sup>, Junyoung Hwang<sup>a</sup>

<sup>a</sup>*Department of Chemical Engineering, Imperial College London, London, UK*

---

### Abstract

This document contains the following sections:

- S1.** Textural characterisation by subcritical adsorption
- S2.** Supercritical gas adsorption experiments
- S3.** Determination of adsorbed phase volume
- S4.** Mathematical fitting of the absolute adsorption isotherm

### References

1. Hwang J, Joss L, Pini R. (2019) *Microporous and Mesoporous Materials* **273**: 107–121
2. Ansari H, Joss L, Hwang J, et al. (2020) *Microporous and Mesoporous Materials* **308**: 110537.
3. Nguyen HGT, Espinal L, van Zee RD et al. (2018) *Adsorption* **24**: 531–539.
4. Nguyen HGT, Sims CM, Toman B, et al. (2020) *Adsorption* **26**: 1253–1266.

---

\*Corresponding author

Email address: [r.pini@imperial.ac.uk](mailto:r.pini@imperial.ac.uk) (Ronny Pini)

## S1. Textural characterisation by subcritical adsorption

Textural characterisation of the three adsorbents was carried out by physisorption analysis in a Quantachrome Autosorb iQ using Ar at 87 K in the pressure range  $1 \times 10^{-7} - 0.1$  MPa. Prior to the experiments, each sample was loaded in the equipment’s external degassing station and regenerated at 473 K (ZIF), 573 K (MZ) and 393 K (MC) for 16 h. The sample was then transferred to the measuring station, where a measurement with helium was conducted to estimate the void volume of the measuring cell, followed by the measurement with Ar in both adsorption and desorption mode. For these experiments, 0.095 g (ZIF), 0.060 g (MZ) and 0.150 g (MC) of adsorbent were used. The experimental data were interpreted upon application of the non local DFT model (NLDFT) available within the instrument software to obtain surface area, pore volume and pore volume distribution (see Table 1 in main manuscript). To this end, the following models fitted to the desorption branch of the isotherm were used: silica/zeolite with cylindrical/spherical pores (ZIF), silica/zeolite with cylindrical pores (MZ) and carbon with cylindrical pores (MC).

## S2. Supercritical gas adsorption experiments

A Rubotherm Magnetic Suspension Balance (MSB) was used to measure the high-pressure adsorption isotherms on the three adsorbents at  $T = 308$  K in the pressure range 0.02 – 21 MPa. The setup installed at Imperial College London is described in previous publications [1,2]; its reliability has been validated through the participation in a recent interlaboratory study, specifically by replicating both  $\text{CO}_2$  and  $\text{CH}_4$  high pressure adsorption isotherms on NIST Reference Materials RM 8852 (ZSM-5) [3] and RM 8850 (Zeolite Y) [4], respectively. The instrument provides high-resolution ( $10 \mu\text{g}$ ) weight measurements at two measuring positions, namely  $\text{MP}_1$  (the basket with the adsorbent) and  $\text{MP}_2$  (the combined measured weight of  $\text{MP}_1$  and a calibrated titanium sinker). These two readings are used to compute the amount of gas adsorbed and the gas bulk density at given pressure and temperature conditions. To this end, three sets of experiments are carried out, which are described next: (i)  $\text{CO}_2$  gravimetry without adsorbent; (ii) Helium gravimetry with adsorbent; and (iii)  $\text{CO}_2$  gravimetry with adsorbent.

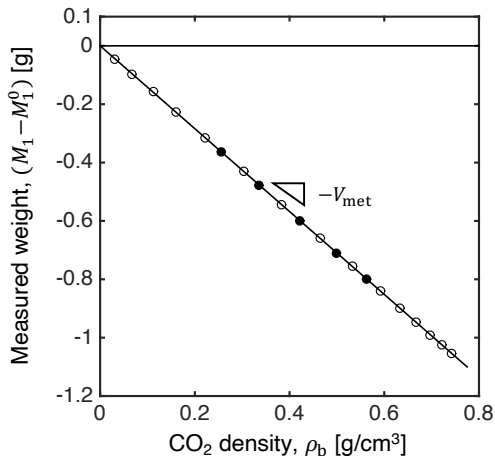

Figure S1: Measured weight ( $= \text{MP}_1 - \text{MP}_{1,0}$ ) plotted as a function of the bulk density for the  $\text{CO}_2$  gravimetry experiment without adsorbent. The temperature is  $80^\circ\text{C}$  and equilibrium pressure point were obtained in the range 2 – 30 MPa. Empty symbols are measurements acquired upon charging gas in the measuring chamber incrementally up to the maximum pressure, while filled symbols are obtained upon depressurising the system. The slope of the regression line corresponds to  $-V_{\text{met}}$  in Eq. 5 of the main manuscript.

Figure S1 shows results from the calibration experiment carried out without adsorbent in the measuring cell and by using  $\text{CO}_2$  as the probing gas; the latter is chosen, because it enables reaching bulk density values

that are equivalent to those measured during the gas adsorption experiment. From the slope of the regression line, the following estimate is obtained:  $V_{\text{net}} = 1.4195 \text{ cm}^3$ , with an uncertainty  $u(V_{\text{net}}) = 1 \times 10^{-4} \text{ cm}^3$ .

The following experimental procedure was applied to carry out the adsorption experiments. After loading the sample in the measuring chamber, a degassing procedure was carried out by heating the system to  $T_{\text{reg}}$  and pulling vacuum for at least 12 hours. The system was subsequently cooled to the temperature used for the Helium gravimetry experiment to yield the measured weight under vacuum,  $\text{MP}_{1,0}$ , (and, accordingly, the mass of adsorbent,  $m_s$ ). The Helium gravimetry experiment with adsorbent was carried out at  $T < T_{\text{reg}}$  with an equilibration time of about 1 hour for each pressure point (see Figure 5 and Table 2 in the main manuscript). Prior to the adsorption experiment, the system was purged with  $\text{CO}_2$  and the measuring chamber was evacuated. The adsorption isotherm was measured at  $T = 308 \text{ K}$ , by exposing the adsorbent to the adsorbate at various pressures and allowing it to equilibrate for at least 60 min. Because of the absence of hysteresis in supercritical adsorption experiments, most isotherms points were taken in desorption mode for practical reasons. A settling time of 30 s, 1.5 min and 30 s was chosen to regulate the automatic cyclic operation of the MSB between the zero point and the two measuring points  $\text{MP}_1$  and  $\text{MP}_2$ , respectively. All measurements were logged and, for each pressure and temperature combination, the average of the last five readings was taken as the equilibrium point used to compute the amount adsorbed. The uncertainty affecting the measured net,  $u(n_{\text{net}})$ , and excess amount adsorbed,  $u(n_{\text{ex}})$ , increases by and large linearly with the bulk density. The ranges observed for the measurements presented in this study are reported in Table 2 for each adsorbent and have been computed upon application of classic formula of error propagation on Eqs. 5 – 8, as described in detail in previous publications [1,2]. These yield error bars that are negligibly small and that are therefore not shown in the plots presented in the main manuscript.

### S3. Determination of the adsorbed phase volume

The following mathematical expression is used to describe the evolution of the adsorbed phase volume per unit mass of solid,  $v_a = V_a/m_s$  ( $\text{cm}^3/\text{g}$ ), as a function of the molar bulk density,  $\rho = \rho_b/M_m$  ( $\text{mol}/\text{L}$ ):

$$v_a = \phi_2 \nu_{\text{tot}} + (a_1 - \phi_2) \nu_{\text{tot}} \frac{(a_2 \rho)^{a_3}}{1 + (a_2 \rho)^{a_3}} \quad (\text{S1})$$

where  $\phi_2$  is the volume fraction of pores with width  $< 2 \text{ nm}$  and  $\nu_{\text{tot}}$  ( $\text{cm}^3/\text{g}$ ) is the specific total pore volume (see Table 1 in the main manuscript);  $a_1$ ,  $a_2$  and  $a_3$  are treated as adjustable parameters. Their values are reported in Table S1 and the evolution of  $v_a$  is plotted in Figure S2 for the three adsorbents considered in this study.

| Adsorbent | $\nu_{\text{tot}}$ [ $\text{cm}^3/\text{g}$ ] | $\phi_2$ [-] | $a_1$ | $a_2$ | $a_3$ |
|-----------|-----------------------------------------------|--------------|-------|-------|-------|
| ZIF       | 0.72                                          | 0.70         | 0.90  | 5     | 1     |
| MZ        | 0.46                                          | 0.38         | 0.55  | 0.1   | 5     |
| MC        | 0.48                                          | 0.007        | 0.66  | 0.1   | 5     |

Table S1: Values of the adjustable parameters to describe the evolution of the volume of the adsorbed phase with density.

The functional form of Eq. S1 was chosen so as to represent a pore-filling process whereby micropores (width  $< 2 \text{ nm}$ ) and very small mesopores (width  $< 3 \text{ nm}$ ) are readily filled at low bulk densities ( $\rho < 2 \text{ mol}/\text{L}$ ), while small mesopores (width  $< 11 - 12 \text{ nm}$ ) experience near-critical condensation starting at a bulk density of approximately ( $\rho \approx 5 \text{ mol}/\text{L}$ ). Using this conceptualisation, the value of parameter  $a_1$  is set by the pore-size distribution measured by Ar at  $87 \text{ K}$  (see Figure 3 in the main manuscript), while the values of the parameters  $a_2$  and  $a_3$  were adjusted, so as to have a gradual increase in the adsorbed phase volume from  $\rho \approx 5 \text{ mol}/\text{L}$  reaching saturation at  $\rho \approx 15 \text{ mol}/\text{L}$ . Because of the absence of mesopores in ZIF, the values of the parameters  $a_2$  and  $a_3$  were chosen so as to reach adsorption saturation at  $\rho < 2 \text{ mol}/\text{L}$ .

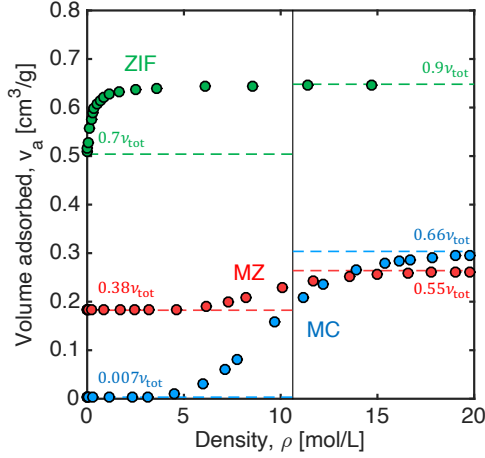

Figure S2: Volume of the adsorbed phase as a function of the bulk density for ZIF, MZ and MC. Parameter values are listed in Table S1.

#### S4. Mathematical fitting of the absolute adsorption isotherm

The absolute adsorption isotherms were fit to a three-parameter logistic function [4]:

$$n_a = \frac{\gamma}{1 + \exp [(-\ln(\rho) + \alpha)/\beta]} \quad (\text{S2})$$

where  $n_a = n_{\text{ex}} + \rho v_a$  is the absolute amount adsorbed (mmol/g),  $\rho$  is the bulk density (mol/L), and  $\alpha$ ,  $\beta$  and  $\gamma$  are the adjustable parameters. The latter are obtained upon minimising the following objective function:

$$\Omega = \sum_{i=1}^N (n_{a,i} - \hat{n}_{a,i})^2 \quad (\text{S3})$$

where  $n_a$  and  $\hat{n}_a$  is the absolute amount adsorbed determined from the experiment and the model, respectively, and  $N$  is the number of experimental point in one isotherm. As indicated in a previous study [4], Eq. S2 (and its parameters) bears no physical significance and the function was chosen, because it can replicate the the form of the isotherm measured on the three adsorbents. The values of the fitted parameters are listed in Table S2.

| Adsorbent | $\alpha$ | $\beta$ | $\gamma$ |
|-----------|----------|---------|----------|
| ZIF       | -0.359   | 1.08    | 13.0     |
| MZ        | 0.349    | 2.42    | 6.93     |
| MC        | 7.09     | 1.94    | 56.5     |

Table S2: Values of the fitted parameters used to describe the absolute adsorption isotherm for ZIF, MZ and MC.
